# Supplementary material
Source: PubMed Central journal article supplement (PMC1746235)
Supplement: thorax_57_2_167__1.pdf [file thorax_57_2_167__1.pdf]

# Appendix 1

## Nursing Records: Symptom Scoring

---

### Daily Symptom Checklist

Patient ID \_\_\_\_\_

Date \_\_\_/\_\_\_/\_\_\_/

*Please circle the number most appropriate to you today. On a scale of 1-10, how do you rate your symptoms? 1 is the worst you could be and 10 is the best that you could be.*

Breathlessness 1 2 3 4 5 6 7 8 9 10

Cough 1 2 3 4 5 6 7 8 9 10

Ability to walk 1 2 3 4 5 6 7 8 9 10

Anxiety 1 2 3 4 5 6 7 8 9 10

Sputum Production 1 2 3 4 5 6 7 8 9 10

Sputum consistency Purulent 1 Mucoid 2 None 3

Sputum color Green 1 Brown 2 Yellow 3 White 4  
Clear 5 None 6

Calculation of symptom score:

**Symptom Score=(Patients Score/Total Score) x100**

---

## Appendix 2: Satisfaction questionnaires

**Scoring of the satisfaction questions from question 4 in in both patient and carer questionnaires. The following values were allocated to the answers:**

Complete satisfaction =10

Above average satisfaction =8

Average satisfaction =6

Below average satisfaction =4

Complete dissatisfaction =2

*The score obtained was expressed as a percentage of the total possible score.*

## **Patient Satisfaction questionnaire**

Date \_\_\_/\_\_\_/\_\_\_

Patient ID \_\_\_\_\_

DOB \_\_\_/\_\_\_/\_\_\_

Place Managed: Hospital

Home

**Space is provided following each question for any further comment.**

*All questions apply to the recent acute worsening of your illness and the care you received during that period*

1. Where would you have preferred to be managed?

Hospital

Home

2. What 3 things were you most pleased about with the care given you during your recent illness?

2.1 \_\_\_\_\_

2.2 \_\_\_\_\_

2.3 \_\_\_\_\_

3. What 3 things were you most dissatisfied with in the care provided to you during your recent illness?

3.1 \_\_\_\_\_

3.2 \_\_\_\_\_

3.3 \_\_\_\_\_

**4. Treatment:** How satisfied were you with:

4.1 the administration of your tablets?

Completely satisfied

Very satisfied

It was adequate

Dissatisfied

Most dissatisfied Score \_\_\_\_\_

Comments \_\_\_\_\_

4.2 your nebulised treatment?

Completely satisfied

Very satisfied

It was adequate

Dissatisfied

Most dissatisfied Score \_\_\_\_\_

Comments \_\_\_\_\_

4.3 the oxygen treatment?

Completely satisfied

Very satisfied

It was adequate

Dissatisfied

Most dissatisfied Score \_\_\_\_\_

Comments \_\_\_\_\_

**5. Symptomatic Progress:**

How satisfied were you with the improvement in your symptoms?

Completely satisfied

Very satisfied

It was adequate

Dissatisfied

Most dissatisfied

Score \_\_\_\_\_

Comments \_\_\_\_\_

**6. Support and Supervision:**

6.1 How worried were you during your illness?

Extremely worried

Very worried

Worried

A little bit worried

Not worried at all

Score \_\_\_\_\_

Comments \_\_\_\_\_

6.2 How well were your worries addressed by the nursing staff?

Fully addressed

Very well addressed

Adequately addressed

Poorly addressed

Not addressed at all

Score \_\_\_\_\_

Comments \_\_\_\_\_

6.3 How safe did you feel during the acute illness?

a. During the day

Extremely safe

Very safe

Safe

Unsafe

Most unsafe

Score \_\_\_\_\_

b. At night

Extremely safe

Very safe

Safe

Unsafe

Most unsafe

Score \_\_\_\_\_

Comments \_\_\_\_\_

6.4.1 How satisfied were you with the nursing care you got during your illness during the day?

Completely satisfied

Very satisfied

It was adequate

Dissatisfied

Most dissatisfied

Score \_\_\_\_\_

6.4.2 How satisfied were you with the nursing care you got during your illness at night?

Completely satisfied

Very satisfied

It was adequate

dissatisfied

Most dissatisfied

Score \_\_\_\_\_

Comments \_\_\_\_\_

6.5 How satisfied were you with the amount of time the nursing staff spent with you?

Completely satisfied

Very satisfied

It was adequate

Dissatisfied

Most dissatisfied

Score \_\_\_\_\_

Comments \_\_\_\_\_

6.6 How satisfied were you with your involvement in your treatment?

Completely satisfied

Very satisfied

It was adequate

Dissatisfied

Most dissatisfied

Score \_\_\_\_\_

Comments \_\_\_\_\_

6.7 How satisfied were with the amount of information you received concerning your illness?

Completely satisfied

Very satisfied

It was adequate

Dissatisfied

Most dissatisfied

Score \_\_\_\_\_

Comments \_\_\_\_\_

6.8 How satisfied were you with the length of treatment?

Completely satisfied

Very satisfied

It was adequate

Dissatisfied

Most dissatisfied

Score \_\_\_\_\_

Comments \_\_\_\_\_

6.9 On discharge how prepared did you feel to resume your usual activities?

Fully prepared

Very prepared

Adequately prepared

Unprepared

Most unprepared

Score \_\_\_\_\_

Comments \_\_\_\_\_

## Carer Satisfaction Questionnaire

Date \_\_\_\_/\_\_\_\_/\_\_\_\_

Patient ID \_\_\_\_\_ DOB \_\_\_\_/\_\_\_\_/\_\_\_\_

**Space is provided following each question for any further comment.**

*All questions apply to the recent acute illness suffered by ..... and the care he/ she received during that time.*

**1. Where would you have preferred the patient to be cared for?**

Hospital

Home

**2. What 3 things did you find most satisfactory in the care provided to**

..... during their recent illness?

2.1 \_\_\_\_\_

2.2 \_\_\_\_\_

2.3 \_\_\_\_\_

3. What 3 things were most dissatisfied about in the care provided during the same period?

3.1 \_\_\_\_\_

3.2 \_\_\_\_\_

3.3 \_\_\_\_\_

4. **Treatment:** How satisfied were you with the patient's

4.1 tablet administration

Completely satisfied

Very satisfied

It was adequate

Unsatisfied

Most unsatisfied Score \_\_\_\_\_

Comments \_\_\_\_\_

4.2 nebulised treatment

Completely satisfied

Very satisfied

It was adequate

Unsatisfied

Most unsatisfied Score \_\_\_\_\_

Comments \_\_\_\_\_

4.3 oxygen administration

Completely satisfied

Very satisfied

It was adequate

Dissatisfied

Most dissatisfied Score \_\_\_\_\_

Comments \_\_\_\_\_



**5. Medical support**

5.1 How worried were you during the acute illness of the patient?

Not worried at all

Slightly worried

Quite worried

Very worried

Extremely worried Score \_\_\_\_\_

Comments \_\_\_\_\_

5.2 How well were your worries addressed by the nursing staff?

Fully addressed

Well addressed

Adequately addressed

Poorly addressed

Very poorly addressed Score \_\_\_\_\_

Comments \_\_\_\_\_

5.3 How acceptable did you find his/ her care?

Completely acceptable

Very acceptable

Acceptable

Not acceptable

Most unacceptable Score \_\_\_\_\_

Comments \_\_\_\_\_

5.4.1 How satisfied were you with the nursing care during the day?

**Completely satisfied**

Very satisfied

It was adequate

Dissatisfied

Most dissatisfied

Score \_\_\_\_\_

Comments \_\_\_\_\_

**5.4.2 How satisfied were you with the nursing care at night?**

**Completely satisfied**

Very satisfied

It was adequate

Dissatisfied

Most dissatisfied

Score \_\_\_\_\_

Comments \_\_\_\_\_

**5.5 How satisfied were you with the amount of information you received concerning the care of the patient?**

**Completely satisfied**

Very satisfied

It was adequate

Dissatisfied

Most dissatisfied

Score \_\_\_\_\_

Comments \_\_\_\_\_

**5.6 How satisfied were you with the length of care of the patient?**

**Completely satisfied**

Very satisfied

It was adequate

Dissatisfied

Most dissatisfied

Score \_\_\_\_\_

Comments \_\_\_\_\_

**5.7 How prepared were you for the discharge of the patient from nursing**

care?

Fully prepared

Well prepared

Adequately prepared

Unprepared

Completely unprepared

Score \_\_\_\_\_

Comments \_\_\_\_\_
